# Supplementary material for: Genetic Analysis of Mps3 SUN Domain Mutants in Saccharomyces cerevisiae Reveals an Interaction with the SUN-Like Protein Slp1
Source: PubMed Central journal article supplement (PMC3516490; doi:10.1534/g3.112.004614), 2012-12-01
Supplement: supp_2.12.1703_TableS2.pdf [file supp_2.12.1703_TableS2.pdf]

**Table S2 Yeast strains used in this study**

| <b>Strain</b>        | <b>Background*</b> | <b>Relevant Genotype**</b>                                                                | <b>Experiment</b> |
|----------------------|--------------------|-------------------------------------------------------------------------------------------|-------------------|
| SLJ1053              | W303               | <i>a mps3Δ::NATMX leu2-3,112 ADE2 lys2Δ pURA3-MPS3</i>                                    |                   |
| SLJ1678              | W303               | <i>a mps3Δ::NATMX leu2::MPS3-LEU2 ADE2 lys2Δ pURA3-MPS3</i>                               | Figure 1A, 6B     |
| SLJ1613              | W303               | <i>a mps3Δ::NATMX leu2::mps3ΔSUN1-LEU2 ADE2 lys2Δ pURA3-MPS3</i>                          | Figure 1A         |
| SLJ1615 &<br>SLJ1616 | W303               | <i>a mps3Δ::NATMX leu2::mps3ΔSUN2-LEU2 ADE2 lys2Δ pURA3-MPS3</i>                          | Figure 1A         |
| SLJ1614              | W303               | <i>a mps3Δ::NATMX leu2::mps3ΔSUN-LEU2 ADE2 lys2Δ pURA3-MPS3</i>                           | Figure 1A         |
| SLJ1712              | W303               | <i>a mps3Δ::HIS3MX leu2::mps3-Y502H-LEU2 ADE2 lys2Δ pURA3-MPS3</i>                        | Figure 1A, 7B     |
| SLJ1622              | W303               | <i>a mps3Δ::NATMX leu2::mps3-A540D-LEU2 ADE2 lys2Δ pURA3-MPS3</i>                         | Figure 1A, 7B     |
| SLJ1711              | W303               | <i>a mps3Δ::NATMX leu2::mps3-F592S-LEU2 ADE2 lys2Δ pURA3-MPS3</i>                         | Figure 1A, 7B, S2 |
| SLJ1370              | W303               | <i>a mps3Δ::NATMX leu2::mps3Δ75-150-LEU2 ADE2 lys2Δ pURA3-MPS3</i>                        | Figure 1A         |
| SLJ1883              | BY                 | <i>α can1Δ::STE2pr-HIS5Sp lyp1Δ met15Δ0</i>                                               |                   |
| SLJ4186              | BY                 | <i>α mps3Δ::MPS3-NATMX can1Δ::STE2pr-HIS5Sp lyp1Δ met15Δ0 pURA3-MPS3</i>                  | Figure 1A         |
| SLJ1885              | BY                 | <i>α mps3Δ::mps3-Y502H-NATMX can1Δ::STE2pr-HIS5Sp lyp1Δ met15Δ0 pURA3-MPS3</i>            | Figure 1A         |
| SLJ1887              | BY                 | <i>α mps3Δ::mps3-A540D-NATMX can1Δ::STE2pr-HIS5Sp lyp1Δ met15Δ0 pURA3-MPS3</i>            | Figure 1A         |
| SLJ1886              | BY                 | <i>α mps3Δ::mps3-F592S-NATMX can1Δ::STE2pr-HIS5Sp lyp1Δ met15Δ0 pURA3-MPS3</i>            | Figure 1A         |
| SLJ2153              | BY                 | <i>α mps3Δ::mps3Δ75-150-NATMX can1Δ::STE2pr-HIS5Sp lyp1Δ met15Δ0 pURA3-MPS3</i>           | Figure 1A         |
| SLJ6406              | SK-1               | <i>a mps3Δ::NATMX pURA3-MPS3</i>                                                          |                   |
| SLJ6407              | SK-1               | <i>α mps3Δ::NATMX pURA3-MPS3</i>                                                          |                   |
| SLJ6408 x<br>SLJ6409 | SK-1               | <i>a/α mps3Δ::NATMX/mps3Δ::NATMX leu2::MPS3-LEU2/leu2::MPS3-LEU2 pURA3-MPS3</i>           | Figure 1B, C      |
| SLJ6417 x<br>SLJ6418 | SK-1               | <i>a/α mps3Δ::NATMX/mps3Δ::NATMX leu2::mps3ΔSUN1-LEU2/leu2::mps3ΔSUN1-LEU2 pURA3-MPS3</i> | Figure 1B, C      |
| SLJ6420 x<br>SLJ6421 | SK-1               | <i>a/α mps3Δ::NATMX/mps3Δ::NATMX leu2::mps3ΔSUN2-LEU2/leu2::mps3ΔSUN2-LEU2 pURA3-MPS3</i> | Figure 1B, C      |
| SLJ6423 x<br>SLJ6424 | SK-1               | <i>a/α mps3Δ::NATMX/mps3Δ::NATMX leu2::mps3ΔSUN2-LEU2/leu2::mps3ΔSUN2-LEU2 pURA3-MPS3</i> | Figure 1B, C      |

|                      |      |                                                                                                 |                                |
|----------------------|------|-------------------------------------------------------------------------------------------------|--------------------------------|
| SLJ6414 x<br>SLJ6415 | SK-1 | <i>a/α mps3Δ::NATMX/mps3Δ::NATMX leu2::(2xmps3ΔSUN-LEU2)/leu2::(2xmps3ΔSUN-LEU2) pURA3-MPS3</i> | Figure 1B, C                   |
| SLJ6411 x<br>SLJ6412 | SK-1 | <i>a/α mps3Δ::NATMX/mps3Δ::NATMX leu2::mps3Δ75-150-LEU2/leu2::mps3Δ75-150-LEU2 pURA3-MPS3</i>   | Figure 1B, C                   |
| SLJ001               | W303 | <i>a</i>                                                                                        | Figure 5B, 5C,<br>S2, S3A, S3B |
| SLJ3529              | W303 | <i>a mps3::MPS3-3xFLAG-KANMX</i>                                                                | Figure 5B,<br>S3B              |
| SLJ3864              | W303 | <i>a slp1::SLP1-3xFLAG-KANMX</i>                                                                | Figure 5B, 5C,<br>S2, S3A      |
| SLJ3837              | W303 | <i>a emp65Δ::GAL-3xHA-EMP65-HIS3MX</i>                                                          | Figure 5B, 5C,<br>S2           |
| SLJ4048              | W303 | <i>α slp1::SLP1-3xFLAG-KANMX emp65Δ::GAL-3xHA-EMP65-HIS3MX</i>                                  | Figure 5C                      |
| SLJ6040              | W303 | <i>a mps3Δ::NATMX emp65Δ::GAL-3xHA-EMP65-HIS3MX pURA3-MPS3</i>                                  | Figure 5D                      |
| SLJ6088              | W303 | <i>a mps3Δ::NATMX emp65Δ::GAL-3xHA-EMP65-HIS3MX SLP1-3xFLAG-KANMX leu2::MPS3-LEU2</i>           | Figure 5D                      |
| SLJ6086              | W303 | <i>a mps3Δ::NATMX emp65Δ::GAL-3xHA-EMP65-HIS3MX SLP1-3xFLAG-KANMX leu2::mps3-F592S-LEU2</i>     | Figure 5D                      |
| SLJ6087              | W303 | <i>a mps3Δ::NATMX emp65Δ::GAL-3xHA-EMP65-HIS3MX SLP1-3xFLAG-KANMX leu2::mps3-Y502H-LEU2</i>     | Figure 5D                      |
| SLJ6092              | W303 | <i>a mps3Δ::NATMX emp65Δ::GAL-3xHA-EMP65-HIS3MX SLP1-3xFLAG-KANMX leu2::mps3Δ75-150-LEU2</i>    | Figure 5D                      |
| SLJ6525              | W303 | <i>a slp1Δ::KANMX his3::SLP1-3xGFP-HIS3 trp1::HDEL-dsRED-TRP1 ADE2</i>                          | Figure 6A                      |
| SLJ4074              | W303 | <i>a emp65Δ::GAL-GFP-EMP65-KANMX trp1::HDEL-dsRED-TRP1 ADE2</i>                                 | Figure 6B, S2                  |
| SLJ6430              | BY   | <i>α tub4::TUB4-GFP-HYGMX::mCherry-TUB1-URA3</i>                                                | Figure 7A                      |
| SLJ6434              | BY   | <i>α slp1Δ::KANMX tub4::TUB4-GFP-HYGMX::mCherry-TUB1-URA3</i>                                   | Figure 7A                      |
| SLJ6436              | BY   | <i>α emp65Δ::KANMX tub4::TUB4-GFP-HYGMX::mCherry-TUB1-URA3</i>                                  | Figure 7A                      |
| SLJ3136              | W303 | <i>a slp1Δ::KANMX</i>                                                                           | Figure 7B                      |
| SLJ3277              | W303 | <i>a emp65Δ::KANMX</i>                                                                          | Figure 7B                      |
|                      | W303 | <i>a htb2::HTB2-mCherry-URA3MX ADE2</i>                                                         | Figure 8B, C                   |
|                      | W303 | <i>a mps3::MPS3-GFP-NATMX htb2::HTB2-mCherry-URA3MX ADE2 lys2Δ</i>                              | Figure 8A, B,<br>C             |
|                      | W303 | <i>a slp1Δ::KANMX mps3::MPS3-GFP-NATMX htb2::HTB2-mCherry-URA3MX ADE2</i>                       | Figure 8A, B,<br>C             |

|         | W303 | <i>a emp65Δ::KANMX mps3::MPS3-GFP-NATMX htb2::HTB2-mCherry-URA3MX ADE2</i>                        | Figure 8A, B, C |
|---------|------|---------------------------------------------------------------------------------------------------|-----------------|
| SLJ5982 | W303 | <i>α mps3Δ::mps3-A540D emp65Δ::GAL-GFP-EMP65-KANMX</i>                                            | Figure S2       |
| SLJ5985 | W303 | <i>α mps3Δ::mps3-F592S emp65Δ::GAL-GFP-EMP65-KANMX</i>                                            | Figure S2       |
| SLJ771  | W303 | <i>a ADE2</i>                                                                                     | Figure S2       |
| SLJ6086 | W303 | <i>a slp1::SLP1-3xFLAG-KANMX emp65Δ::GAL-3xHA-EMP65-HIS3MX mps3Δ::NATMX leu2::mps3-F592S-LEU2</i> | Figure S2       |
| SLJ1234 | W303 | <i>α mps3::MPS3-3xHA-HIS3MX</i>                                                                   | Figure S3A      |
| SLJ5854 | W303 | <i>α mps3::MPS3-3xHA-HIS3MX slp1::SLP1-3xFLAG-KANMX</i>                                           | Figure S3A      |
| SLJ6151 | W303 | <i>α mps3::MPS3-3xHA-HIS3MX slp1::SLP1-3xFLAG-KANMX emp65Δ::HYGMX</i>                             | Figure S3A      |
| SLJ5846 | W303 | <i>a mps3::MPS3-3xFLAG-KANMX emp65Δ::GAL-3xHA-EMP65-HIS3MX</i>                                    | Figure S3B      |
| SLJ6057 | W303 | <i>α mps3::MPS3-3xFLAG-KANMX emp65Δ::GAL-3xHA-EMP65-HIS3MX slp1Δ::NATMX</i>                       | Figure S3B      |

W303 are *ade2-1 ura3-1 trp1-1 leu2-3,112 his3-11, 15 can1-100*, BY are *ura3Δ0 leu2Δ0 his3Δ1* and SK-1 are *ho::hisG lys2 ura3 leu2::hisG trp1ΔFA::hisG his3-11,15*

\*\* pURA3-MPS3 was removed by plating cells to 5-FOA immediately before the experiment
